# Supplementary material for: Changes in Oxidative Status Biomarkers in Saliva and Serum in the Equine Gastric Ulcer Syndrome and Colic of Intestinal Aetiology: A Pilot Study
Source: MDPI journal article supplement (doi:10.3390/ani12050667), 2022-03-07
Supplement: s1 [file s1]

## Diseased population

| Age (years) | Gender   | Breed              | Diagnosis                                   | SIRS score | Outcome      |
|-------------|----------|--------------------|---------------------------------------------|------------|--------------|
| 11          | Mare     | Warmblood breed    | EGGD                                        | 0          | survivor     |
| 11          | Mare     | Warmblood breed    | ESGD+EGGD                                   | 0          | survivor     |
| 10          | Gelding  | Warmblood breed    | EGGD                                        | 0          | survivor     |
| 15          | Gelding  | Warmblood breed    | ESGD+EGGD                                   | 0          | survivor     |
| 13          | Mare     | Warmblood breed    | ESGD+EGGD                                   | 0          | survivor     |
| 8           | Gelding  | Warmblood breed    | ESGD                                        | 0          | survivor     |
| 5           | Gelding  | Warmblood breed    | ESGD+EGGD                                   | 0          | survivor     |
| 15          | Gelding  | Warmblood breed    | EGGD                                        | 0          | survivor     |
| 9           | Mare     | Warmblood breed    | EGGD                                        | 0          | survivor     |
| 14          | Mare     | Crossbred          | ESGD+EGGD                                   | 0          | survivor     |
| 10          | Gelding  | Pony               | EGGD                                        | 0          | survivor     |
| 17          | Gelding  | Warmblood breed    | ESGD                                        | 0          | survivor     |
| 11          | Gelding  | Warmblood breed    | EGGD                                        | 0          | survivor     |
| 6           | Mare     | Trotter breed      | ESGD+EGGD                                   | 0          | survivor     |
| 13          | Gelding  | Friesian horse     | ESGD+EGGD                                   | 0          | survivor     |
| 14          | Gelding  | Warmblood breed    | EGGD                                        | 0          | survivor     |
| 13          | Gelding  | Warmblood breed    | ESGD                                        | 0          | survivor     |
| 5           | Gelding  | Quarter horse      | ESGD                                        | 0          | survivor     |
| 10          | Mare     | Warmblood breed    | ESGD+EGGD                                   | 0          | survivor     |
| 7           | Mare     | Pony               | ESGD+EGGD                                   | 0          | survivor     |
| 16          | Stallion | Crossbred          | ESGD                                        | 0          | survivor     |
| 10          | Mare     | Pony               | EGGD                                        | 0          | survivor     |
| 7           | Stallion | Pure Spanish horse | ESGD                                        | 1          | survivor     |
| 6           | Stallion | Pure Spanish horse | Proximal enteritis                          | 2          | survivor     |
| 16          | Gelding  | Warmblood breed    | Large colon displacement                    | 0          | survivor     |
| 12          | Gelding  | Holsteiner         | Large colon displacement                    | 1          | survivor     |
| 12          | Gelding  | Warmblood breed    | Impaction of the jejunum                    | 2          | survivor     |
| 11          | Stallion | Pure Spanish horse | Impaction of Caecum                         | 1          | survivor     |
| 16          | Gelding  | Icelandic horse    | Medical colic                               | 1          | survivor     |
| 4           | Mare     | Crossbreed         | Impaction of the pelvic flexure             | 2          | survivor     |
| 7           | Gelding  | Friesian horse     | Impaction of the jejunum                    | 2          | non-survivor |
| 8           | Stallion | Lusitanian horse   | Large colon displacement                    | 2          | survivor     |
| 14          | Mare     | Crossbreed         | Strangulating lesion in the small intestine | 3          | non-survivor |
| 9           | Gelding  | Thoroughbred       | Large colon displacement                    | 0          | survivor     |
| 4           | Stallion | Arabian            | Colitis                                     | 2          | non-survivor |
| 10          | Stallion | Pure Spanish horse | Proximal enteritis                          | 2          | survivor     |
| 10          | Mare     | Arabian            | Strangulating lesion in the small intestine | 2          | non-survivor |
| 18          | Gelding  | Warmblood breed    | Colitis                                     | 0          | survivor     |
| 14          | Gelding  | Crossbreed         | Nephrosplenic entrapment                    | 3          | non-survivor |
| 18          | Gelding  | Crossbreed         | Volvulus in the large colon                 | 3          | non-survivor |
| 20          | Mare     | Crossbreed         | Impaction of ileum and colitis              | 2          | non-survivor |
| 15          | Gelding  | Lusitanian horse   | Impaction in the small colon                | 2          | non-survivor |
| 5           | Mare     | Lusitanian horse   | Impaction of the pelvic flexure             | 0          | survivor     |
| 17          | Mare     | Warmblood breed    | Impaction of the pelvic flexure             | 1          | survivor     |
| 12          | Mare     | Crossbreed         | Proximal enteritis                          | 3          | survivor     |

### Healthy population

| Age<br>(years) | Gender   | Breed              | Diagnosis | SIRS score | Outcome |
|----------------|----------|--------------------|-----------|------------|---------|
| 4              | Mare     | Warmblood breed    | N/A       | 0          | N/A     |
| 20             | Mare     | Pony               | N/A       | 0          | N/A     |
| 18             | Mare     | Crossbreed         | N/A       | 0          | N/A     |
| 14             | Mare     | Knabstrupper       | N/A       | 0          | N/A     |
| 4              | Stallion | Pure Spanish horse | N/A       | 0          | N/A     |
| 12             | Stallion | Arabian            | N/A       | 0          | N/A     |
| 4              | Gelding  | Crossbreed         | N/A       | 0          | N/A     |
| 5              | Gelding  | Warmblood breed    | N/A       | 0          | N/A     |
| 8              | Gelding  | Pure Spanish horse | N/A       | 0          | N/A     |
| 14             | Gelding  | Pony               | N/A       | 0          | N/A     |
| 20             | Mare     | Pony               | N/A       | 0          | N/A     |
| 17             | Gelding  | Crossbreed         | N/A       | 0          | N/A     |
| 10             | Gelding  | Pure Spanish horse | N/A       | 0          | N/A     |
| 8              | Mare     | Crossbreed         | N/A       | 0          | N/A     |
